# Supplementary material
Source: publisher figshare collection journal article supplement (https://frontiersin.figshare.com/ndownloader/files/20149598)
Supplement: Supplementary file [file 20149598]

## **Supplementary material**

**Figure S1.** Variation in SE as a proportion of the mean with sample size (No. of the specimen) to determine the minimum sample size for mass-specific pumping rate in a particular session.

**Figure S2.** Pumping rate (PR, mL min<sup>-1</sup>) vs. Biomass (AFDW, g) on multi-osculated specimens.

**Figure S1**

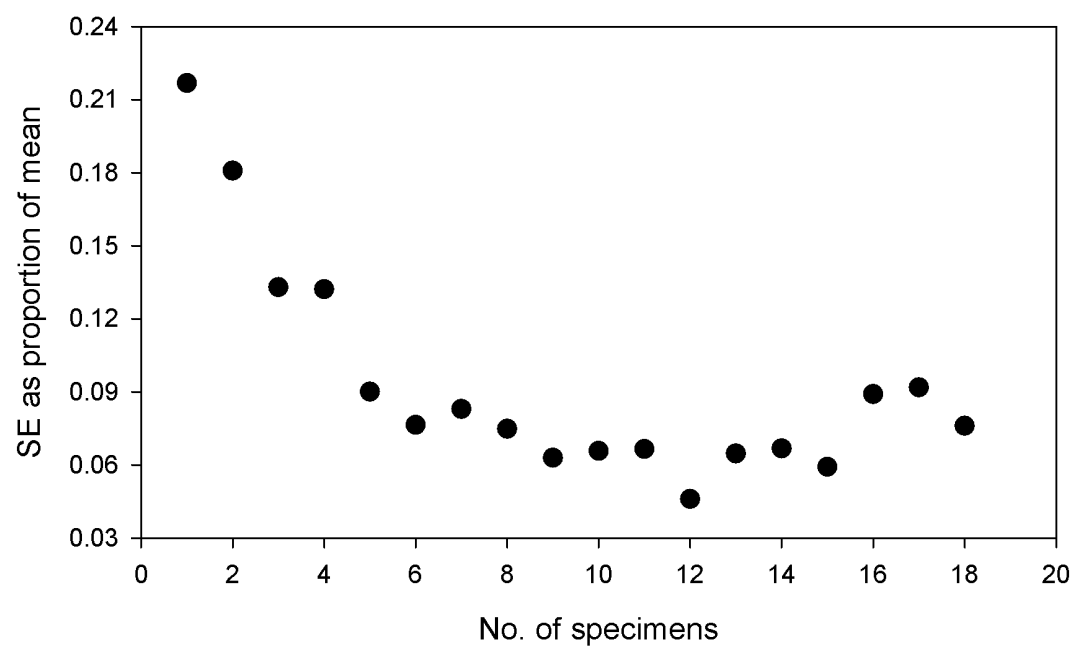

Figure S2

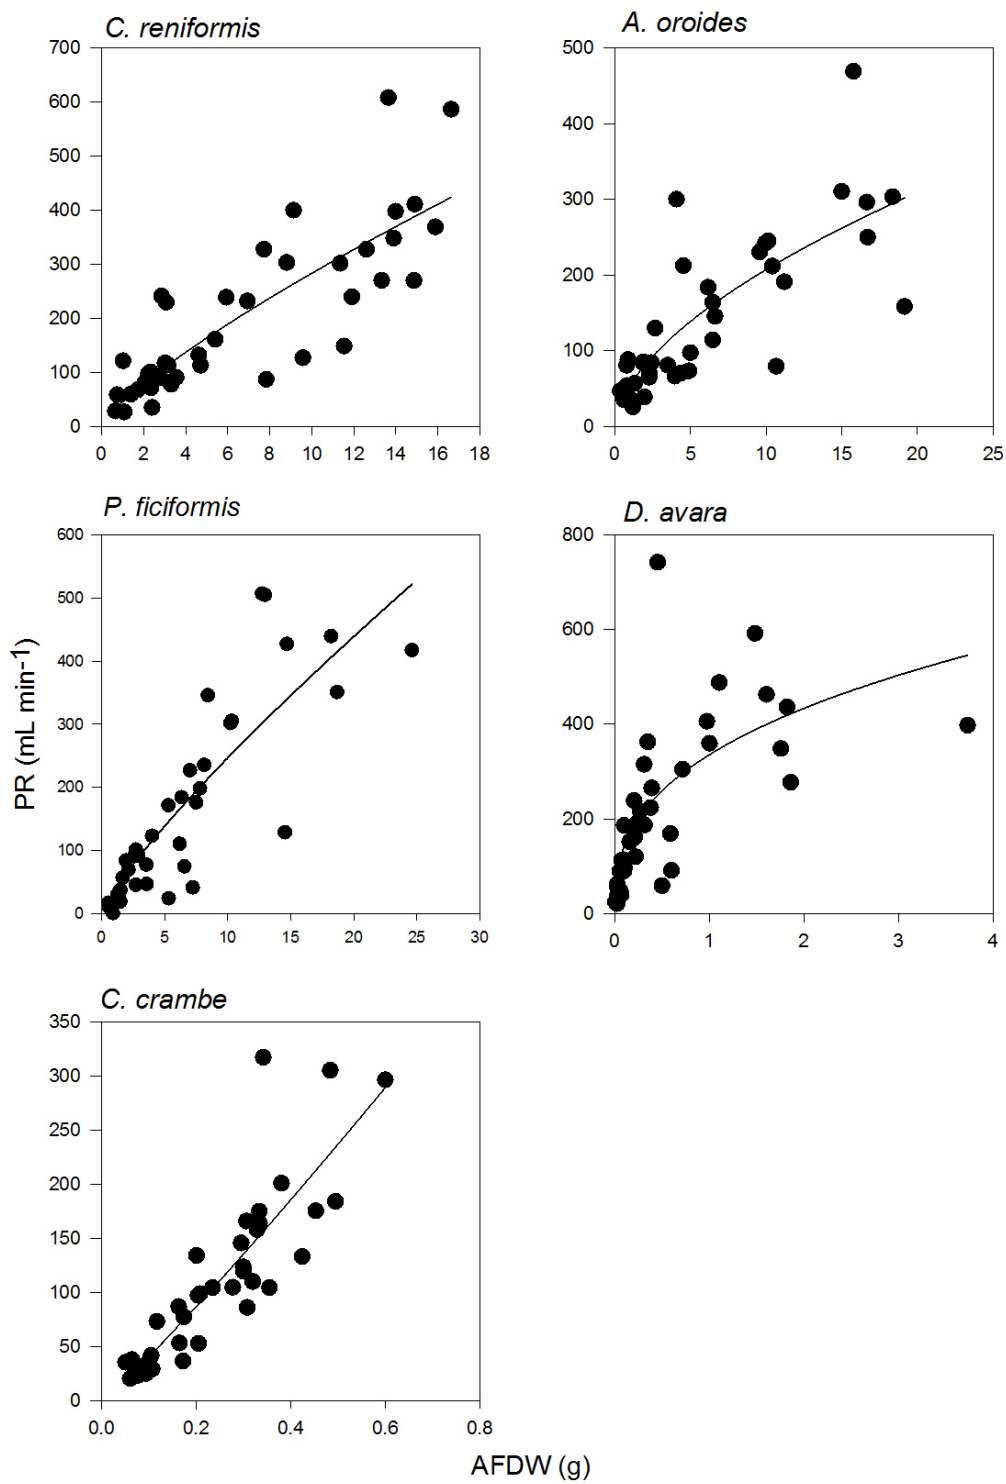

**Table S1.** Comparison between volume-specific pumping rate ( $PR_v$ ,  $\text{mL min}^{-1} (\text{cm sponge})^{-3}$ ) measured using the dye front speed (DFS) and dye speed (DS) method for the same specimens at the same time. Data are expressed as mean  $\pm$  95% CI.  $n$  number of sampled specimens;  $p$  values are for a paired t-test. The statistical power to detect a 20% difference from the DFS method was calculated for each species using the observed variability of the paired differences and  $\alpha=0.05$ .

| Specie               | n  | DFS               | DS               | $p$ -value | Statistical power | Deviation of DS from DFS |
|----------------------|----|-------------------|------------------|------------|-------------------|--------------------------|
| <i>C. reniformis</i> | 19 | 4.46 $\pm$ 0.97   | 4.36 $\pm$ 0.97  | 0.828      | 100%              | -3%                      |
| <i>P. ficiformis</i> | 20 | 2.41 $\pm$ 0.97   | 2.14 $\pm$ 1.20  | 0.488      | 79%               | -11%                     |
| <i>D. avara</i>      | 21 | 14.42 $\pm$ 4.32  | 13.60 $\pm$ 3.48 | 0.813      | 90%               | -6%                      |
| <i>A. oroides</i>    | 22 | 2.48 $\pm$ 0.97   | 2.01 $\pm$ 0.82  | 0.413      | 96%               | -19%                     |
| <i>C. crambe</i>     | 17 | 25.13 $\pm$ 10.56 | 17.08 $\pm$ 7.60 | 0.107      | 79%               | -32%                     |

**Table S2.** Average volume-specific pumping rate (PR<sub>v</sub>, mL min<sup>-1</sup> (cm sponge)<sup>-3</sup>) normalized by sponge volume measured *in situ* during each sampling session. Data expressed as mean ± 95% CI. *n*, number of sampled specimens for each sampling session.

| Sampling date  | Temp (°C)   | <i>A. oroides</i> |                 |            | <i>C. reniformis</i> |                 |            | <i>P. ficiformis</i> |                 |            | <i>D. avara</i> |                 |            | <i>C. crambe</i> |                 |            |
|----------------|-------------|-------------------|-----------------|------------|----------------------|-----------------|------------|----------------------|-----------------|------------|-----------------|-----------------|------------|------------------|-----------------|------------|
|                |             | n                 | PR <sub>v</sub> | 95%CI      | n                    | PR <sub>v</sub> | 95%CI      | n                    | PR <sub>v</sub> | 95%CI      | n               | PR <sub>v</sub> | 95%CI      | n                | PR <sub>v</sub> | 95%CI      |
| Jul-12         | 22          | 7                 | 2.2             | 0.6        | 14                   | 2.8             | 0.5        | 9                    | 2.7             | 1.3        | 7               | 3.3             | 2.2        | 8                | 9.2             | 2.2        |
| Oct-12         | 19          | 16                | 2.3             | 0.8        | 56                   | 4.2             | 0.5        | 7                    | 1.2             | 0.5        | 15              | 5.8             | 1.5        | 18               | 13.1            | 2.8        |
| Nov-12         | 16          | 15                | 2.1             | 0.6        | 17                   | 3.3             | 0.5        | 15                   | 2.1             | 0.5        | 11              | 9.8             | 5.1        | 15               | 15.8            | 3.0        |
| Jan-13         | 13          | 13                | 1.9             | 0.5        | 24                   | 4.0             | 1.2        | 15                   | 2.0             | 0.5        | 11              | 7.4             | 4.1        | 22               | 18.5            | 3.7        |
| Apr-13         | 13          | 16                | 1.7             | 0.8        | 16                   | 2.9             | 0.9        | 11                   | 2.1             | 1.2        | 14              | 8.0             | 2.9        | 16               | 12.4            | 3.3        |
| May-13         | 15          | 12                | 1.5             | 0.9        | 17                   | 2.1             | 0.4        | 14                   | 1.5             | 0.6        | 13              | 9.1             | 4.0        | 16               | 19.6            | 4.7        |
| Jul-13         | 21          | 19                | 1.3             | 0.4        | 15                   | 3.0             | 1.1        | 18                   | 1.5             | 0.3        | 15              | 9.0             | 2.9        | 21               | 15.0            | 3.3        |
| Oct-13         | 19          | 16                | 2.7             | 1.0        | 15                   | 4.6             | 1.6        | 15                   | 1.2             | 0.5        | 14              | 10.9            | 3.8        | 17               | 15.0            | 5.5        |
| Jan-14         | 13          | 14                | 2.6             | 1.0        | 15                   | 3.7             | 1.3        | 15                   | 1.6             | 0.5        | 8               | 9.6             | 3.9        | 13               | 26.0            | 13.4       |
| Apr-14         | 15          | 16                | 1.5             | 0.4        | 17                   | 4.0             | 1.1        | 13                   | 2.6             | 1.5        | 16              | 10.1            | 4.5        | 18               | 15.5            | 5.8        |
| Jul-14         | 22          | 14                | 3.0             | 0.9        | 15                   | 4.1             | 0.9        | 15                   | 2.9             | 0.7        | 20              | 10.0            | 2.6        | 17               | 21.7            | 5.7        |
| <b>Average</b> | <b>17.1</b> | <b>14</b>         | <b>2.1</b>      | <b>0.7</b> | <b>20</b>            | <b>3.5</b>      | <b>0.9</b> | <b>13</b>            | <b>2.0</b>      | <b>0.7</b> | <b>13</b>       | <b>8.5</b>      | <b>3.4</b> | <b>16</b>        | <b>16.5</b>     | <b>4.8</b> |
| <b>95%CI</b>   | <b>2</b>    | -                 | <b>0.3</b>      | -          | -                    | <b>0.4</b>      | -          | -                    | <b>0.3</b>      | -          | -               | <b>1.3</b>      | -          | -                | <b>2.7</b>      | -          |
